# Supplementary material
Source: MDPI journal article supplement (https://www.mdpi.com/2073-4344/8/11/530)
Supplement: s1 [file s1]

Supporting Information

# Infrared Characterization of the Bidirectional Oxygen-Sensitive [NiFe]-Hydrogenase from *E. coli*

Moritz Senger <sup>1</sup>, Konstantin Laun <sup>1</sup>, Basem Soboh <sup>2</sup> and Sven T. Stripp <sup>1,\*</sup>

<sup>1</sup> Department of Physics, Experimental Molecular Biophysics, Freie Universität Berlin, 14195 Berlin, Germany; senger@zedat.fu-berlin.de (M.S.); konstantin.laun@fu-berlin.de (K.L.)

<sup>2</sup> Department of Physics, Genetic Biophysics, Freie Universität Berlin, 14195 Berlin, Germany; basem.soboh@fu-berlin.de

\* Correspondence: sven.stripp@fu-berlin.de; Tel.: +49-030-838-55069

## Contents

Figure S1 <sup>13</sup>CO isotope editing

Figure S2 Further H<sub>2</sub> titrations and Ni-R band assignment

Figure S3 Further CO titrations

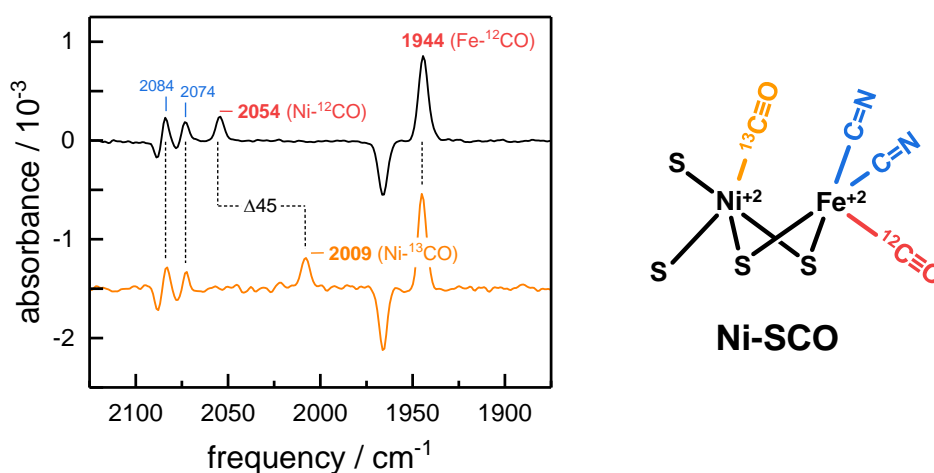

**Figure S1.**  $^{13}\text{CO}$  isotope editing. The black difference spectrum shows the enrichment of Ni-SCO over Ni-C and Ni-SI upon  $^{12}\text{CO}$  binding the nickel ion (see main script). In the presence of  $^{13}\text{CO}$ , the Ni-CO signal shifts from 2054 to 2009  $\text{cm}^{-1}$  (orange difference spectrum). The observed shift of 45  $\text{cm}^{-1}$  to lower frequencies is explained by the difference in reduced mass  $\mu = \frac{m_1 m_2}{m_1 + m_2}$  between  $^{12}\text{CO}$  and  $^{13}\text{CO}$ . The  $\text{Fe}(\text{CN})_2\text{CO}$  signature remains unaffected by the isotope editing, which proves the presence of an individual CO ligand at the nickel site.

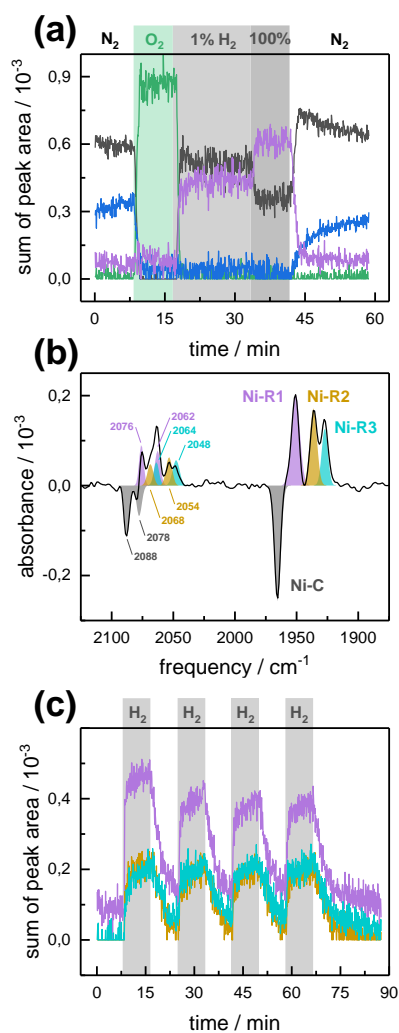

**Figure S2.** Further  $H_2$  titrations and Ni-R band assignment. **(a)** In order to assign the  $Fe(CN)_2CO$  signature of the Ni-R states the following procedure was attempted. First, the sample was brought in contact with 1%  $O_2$  to homogenize the film and enrich Ni-B over the as-isolated mixture of Ni-C and Ni-SI (see Figure 6 in the main script). Second,  $O_2$  was replaced by 1%  $H_2$  to reductively activate the enzyme. The reduced species Ni-C and Ni-R were found to dominate the spectrum with no increase of the oxidized Ni-SI in the presence of  $H_2$ . However, the  $H_2 - O_2$  difference spectrum still included the negative bands of Ni-B. Although the film was completely reactivated with 1%  $H_2$ , a further increase of Ni-R over Ni-C was observed by switching the gas stream to 100%  $H_2$ . **(b)** “100%  $H_2 - 1\% H_2$ ” difference spectrum that depicts the increase of Ni-R1 – R3 over Ni-C. The  $Fe(CN)_2CO$  signature of Ni-C was identified before (see main script). Based on the singular peaks at 2076, 2054, and 2048  $cm^{-1}$  and the observation that both CO and  $CN^-$  bands shift in the same direction, a unique fit was achieved for the  $Fe(CN)_2CO$  assignment of Ni-R1 – R3 (see Table 1 in the main script). **(c)** This data was used to describe the concomitant increase and decrease of R-states, e.g., depending on the presence or absence of  $H_2$  from the carrier gas.

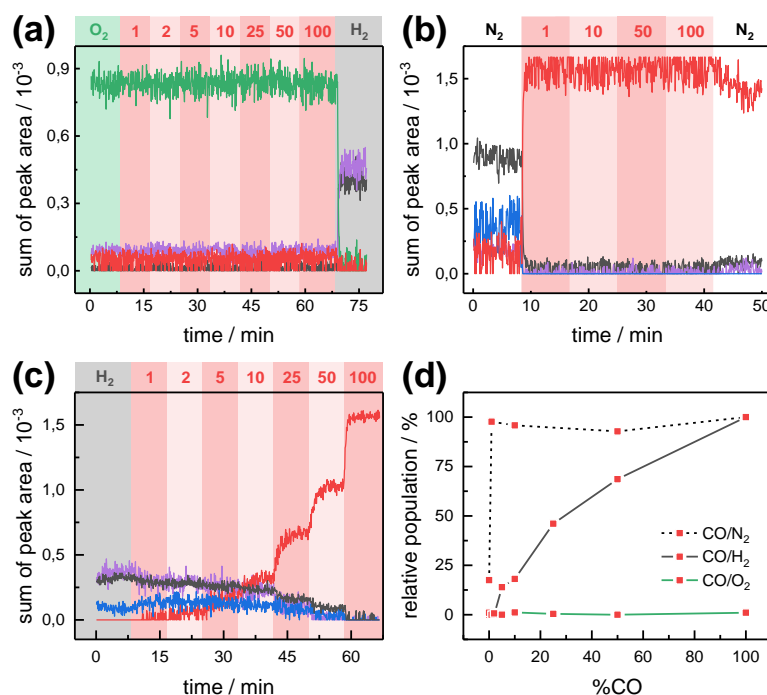

**Figure S3.** Further CO titrations. **(a)** In the presence of  $O_2$  carrier gas, no CO inhibition was observed even when the gas stream was switched to 100% CO. The reaction with  $O_2$  very efficiently removes Ni-SI from the equilibrium of species. Therefore, CO cannot bind to the [NiFe] active site. **(b)** With  $N_2$  as carrier gas, 1% CO in the gas stream completely converts the film into Ni-SCO. The mixture of Ni-C and Ni-SI (characteristic for HYD-2 under inert gas) facilitates an immediate conversion into Ni-SCO in the presence of CO. **(c)** With  $H_2$  as carrier gas, an apparent decrease in the CO affinity is observed (see main script). **(d)** When the relative population of Ni-SCO is plotted against CO ambient partial pressure, the differences in CO affinity as a function of carrier gas can be visualized in a single graph.
